# Supplementary material for: Advanced Molecular Dynamics Approaches to Model a Tertiary Complex APRIL/TACI with Long Glycosaminoglycans
Source: MDPI journal article supplement (doi:10.3390/biom11091349), 2021-09-12
Supplement: s1 [file s1]

## Supplementary Information

**Table S1.** RMSD values from the performed MD runs. RMS-GAG means RMSD of the GAG molecule in respect to its starting pose, when RMS-GAG-PROTEIN additionally include GAG position in respect to protein.

| <b>REMD-RS</b>         |         |                                              |                        |                        |                        |
|------------------------|---------|----------------------------------------------|------------------------|------------------------|------------------------|
| <b>Complex variant</b> |         | <b>Lowest REMD-RS Electrostatic Energies</b> |                        | <b>Manually Chosen</b> |                        |
|                        |         | <b>rms_GAG</b>                               | <b>rms_GAG_protein</b> | <b>rms_GAG</b>         | <b>rms_GAG_protein</b> |
| APRIL-TACI-HP dp24     | 1       | 6.1                                          | 9.2                    | 5.2                    | 10.2                   |
|                        | 2       | 4.8                                          | 9.9                    | 6.1                    | 12.1                   |
|                        | 3       | 6                                            | 9.8                    | 5.6                    | 10.2                   |
|                        | 4       | 7.7                                          | 12.2                   | 6.6                    | 9.2                    |
|                        | 5       | 5.6                                          | 9.9                    | 5.6                    | 10.3                   |
|                        | 6       | 6.5                                          | 10.6                   | 6.3                    | 10.9                   |
|                        | 7       | 5.8                                          | 10.2                   | 6.4                    | 12.7                   |
|                        | 8       | 6.4                                          | 11.5                   | 6.1                    | 11.0                   |
|                        | 9       | 7                                            | 11.0                   | 7.3                    | 10.3                   |
|                        | 10      | 4.8                                          | 11.0                   | 5.3                    | 11.2                   |
|                        | average | 6.1                                          | 10.5                   | 6.0                    | 10.8                   |
| APRIL-BCMA-HP dp24     | 1       | 7.9                                          | 11.9                   | 7.5                    | 12.0                   |
|                        | 2       | 4.9                                          | 14.6                   | 4.4                    | 11.7                   |
|                        | 3       | 6.3                                          | 11.0                   | 6.0                    | 11.0                   |
|                        | 4       | 5.3                                          | 8.9                    | 7.8                    | 14.2                   |
|                        | 5       | 5.7                                          | 8.2                    | 6.1                    | 16.9                   |
|                        | 6       | 4.7                                          | 10.9                   | 5.4                    | 10.1                   |
|                        | 7       | 4.7                                          | 12.2                   | 5.7                    | 11.8                   |
|                        | 8       | 5                                            | 8.4                    | 7.7                    | 12.1                   |
|                        | 9       | 4.6                                          | 11.0                   | 6.3                    | 10.2                   |
|                        | 10      | 4.5                                          | 8.1                    | 5.7                    | 12.0                   |
|                        | average | 5.4                                          | 10.5                   | 6.3                    | 12.2                   |
| Autodock3              |         |                                              |                        |                        |                        |
| Complex variant        |         | rms_GAG                                      | rms_GAG_protein        |                        |                        |

|                    |         |      |      |  |
|--------------------|---------|------|------|--|
| APRIL-TACI-HP dp24 | 1       | 9.6  | 13.5 |  |
|                    | 2       | 7.9  | 10.3 |  |
|                    | 3       | 6.6  | 11.7 |  |
|                    | 4       | 8.1  | 12.0 |  |
|                    | 5       | 4.5  | 8.8  |  |
|                    | average | 7.3  | 11.3 |  |
| APRIL-BCMA-HP dp24 | 1       | 8.9  | 10.8 |  |
|                    | 2       | 8.1  | 15.5 |  |
|                    | 3       | 8.8  | 21.5 |  |
|                    | 4       | 14.2 | 18.5 |  |
|                    | 5       | 5.5  | 11.1 |  |
| average            |         | 9.1  | 15.5 |  |

**Table S2.** MM-GBSA analysis for the APRIL-BCMA/TACI-HP MD simulations.

| complex<br>variant     | lowest REMD-RS electrostatic<br>energies |                                  | manually chosen          |                               |
|------------------------|------------------------------------------|----------------------------------|--------------------------|-------------------------------|
|                        | $\Delta G$ [kcal/mol]                    | average $\Delta G$<br>[kcal/mol] | $\Delta G$<br>[kcal/mol] | average $\Delta G$ [kcal/mol] |
| APRIL-BCMA-<br>HP dp24 | -215.5                                   | -157.0                           | -152.3                   | -152.1                        |
|                        | -146.1                                   |                                  | -158.2                   |                               |
|                        | -154.8                                   |                                  | -138.4                   |                               |
|                        | -124.5                                   |                                  | -144.1                   |                               |
|                        | -150.9                                   |                                  | -142.1                   |                               |
|                        | -137.6                                   |                                  | -126.4                   |                               |
|                        | -148.4                                   |                                  | -163.4                   |                               |
|                        | -154.8                                   |                                  | -179.4                   |                               |
|                        | -167.5                                   |                                  | -158.8                   |                               |
|                        | -169.7                                   |                                  | -157.7                   |                               |
| APRIL-BCMA-<br>HP dp48 | -162.2                                   | -158.0                           | -163.9                   | -159.4                        |
|                        | -155.8                                   |                                  | -146.8                   |                               |
|                        | -158.5                                   |                                  | -144.0                   |                               |
|                        | -139.6                                   |                                  | -156.5                   |                               |
|                        | -171.6                                   |                                  | -170.5                   |                               |
|                        | -155.5                                   |                                  | -156.7                   |                               |
|                        | -168.1                                   |                                  | -165.0                   |                               |
|                        | -167.8                                   |                                  | -162.9                   |                               |
|                        | -152.3                                   |                                  | -171.0                   |                               |
|                        | -148.3                                   |                                  | -156.6                   |                               |
| APRIL-TACI-HP<br>dp24  | -178.2                                   | -192.5                           | -173.1                   | -184.1                        |
|                        | -164.6                                   |                                  | -133.6                   |                               |
|                        | -185.5                                   |                                  | -210.3                   |                               |
|                        | -194.5                                   |                                  | -183.6                   |                               |
|                        | -223.5                                   |                                  | -236.5                   |                               |
|                        | -207.0                                   |                                  | -186.3                   |                               |
|                        | -175.1                                   |                                  | -180.4                   |                               |
|                        | -235.5                                   |                                  | -189.9                   |                               |
|                        | -185.5                                   |                                  | -149.3                   |                               |
|                        | -175.4                                   |                                  | -197.8                   |                               |
| APRIL-TACI-HP<br>dp48  | -215.9                                   | -240.8                           | -241.0                   | -248.4                        |
|                        | -224.3                                   |                                  | -269.7                   |                               |
|                        | -203.2                                   |                                  | -238.3                   |                               |
|                        | -222.1                                   |                                  | -247.7                   |                               |
|                        | -282.2                                   |                                  | -251.9                   |                               |
|                        | -252.4                                   |                                  | -241.8                   |                               |
|                        | -260.4                                   |                                  | -254.1                   |                               |
|                        | -215.6                                   |                                  | -220.3                   |                               |
|                        | -250.3                                   |                                  | -258.0                   |                               |
|                        | -281.8                                   |                                  | -260.8                   |                               |

**Table S3.** MM-GBSA per residue decomposition analysis for the APRIL-BCMA/TACI-HP MD simulations. The residues belonging to BMCA/TACI molecules are only listed. The letter after the residue corresponds to the monomeric unit within the trimer.

| Complex Variant    | Lowest REMD-RS Electrostatic Energies |     |                       | Manually Chosen    |     |                       |
|--------------------|---------------------------------------|-----|-----------------------|--------------------|-----|-----------------------|
|                    | Amino Acid Residue                    |     | $\Delta G$ [kcal/mol] | Amino Acid Residue |     | $\Delta G$ [kcal/mol] |
| APRIL-BCMA-HP dp24 | CYX A                                 | 8   | -1.9                  | CYX A              | 8   | -2.0                  |
|                    | ARG A                                 | 27  | -2.0                  | ARG A              | 27  | -2.1                  |
|                    | ARG A                                 | 39  | -1.7                  | ARG A              | 39  | -1.8                  |
|                    | GLY B                                 | 2   | -2.2                  | GLY B              | 2   | -2.1                  |
|                    | ARG B                                 | 27  | -2.1                  | ARG B              | 27  | -2.1                  |
|                    | ARG B                                 | 39  | -1.7                  | ARG B              | 39  | -1.7                  |
|                    | CYX C                                 | 8   | -2.0                  | CYX C              | 8   | -1.8                  |
|                    | ARG C                                 | 27  | -2.0                  | ARG C              | 27  | -2.0                  |
|                    | ARG C                                 | 39  | -1.7                  | ARG C              | 39  | -1.8                  |
| APRIL-BCMA-HP dp48 | CYX A                                 | 8   | -3.0                  | CYX A              | 8   | -3.0                  |
|                    | ARG A                                 | 27  | -3.0                  | ARG A              | 27  | -3.1                  |
|                    | ARG A                                 | 39  | -2.7                  | ARG A              | 39  | -2.8                  |
|                    | GLY B                                 | 2   | -3.0                  | GLY B              | 2   | -3.0                  |
|                    | ARG B                                 | 27  | -3.0                  | ARG B              | 27  | -3.0                  |
|                    | ARG B                                 | 39  | -2.6                  | ARG B              | 39  | -2.7                  |
|                    | CYX C                                 | 8   | -2.8                  | CYX C              | 8   | -3.0                  |
|                    | ARG C                                 | 27  | -2.9                  | ARG C              | 27  | -3.0                  |
|                    | ARG C                                 | 39  | -2.6                  | ARG C              | 39  | -2.7                  |
| APRIL-TACI-HP dp24 | SER A                                 | 86  | -2.3                  | SER A              | 86  | -1.8                  |
|                    | ARG A                                 | 72  | -1.7                  | ARG A              | 72  | -1.6                  |
|                    | LYS A                                 | 73  | -1.8                  | LYS A              | 73  | -1.7                  |
|                    | LYS A                                 | 77  | -1.9                  | LYS A              | 77  | -1.8                  |
|                    | ARG A                                 | 84  | -3.1                  | ARG A              | 84  | -2.6                  |
|                    | LYS A                                 | 98  | -1.9                  | LYS A              | 98  | -1.9                  |
|                    | CYX B                                 | 71  | -2.6                  | CYX B              | 71  | -2.2                  |
|                    | ARG B                                 | 72  | -3.3                  | ARG B              | 72  | -3.8                  |
|                    | LYS B                                 | 73  | -2.3                  | LYS B              | 73  | -2.0                  |
|                    | LYS B                                 | 77  | -1.9                  | LYS B              | 77  | -1.9                  |
|                    | ARG B                                 | 84  | -3.6                  | ARG B              | 84  | -2.7                  |
|                    | LYS B                                 | 98  | -2.0                  | LYS B              | 98  | -2.0                  |
|                    | CYX C                                 | 71  | -1.6                  | CYX C              | 71  | -1.9                  |
|                    | ARG C                                 | 72  | -1.6                  | ARG C              | 72  | -1.9                  |
|                    | LYS C                                 | 73  | -1.6                  | LYS C              | 73  | -1.9                  |
|                    | LYS C                                 | 77  | -1.7                  | LYS C              | 77  | -1.8                  |
|                    | ARG C                                 | 84  | -2.3                  | ARG C              | 84  | -3.0                  |
|                    | LYS C                                 | 98  | -1.9                  | LYS C              | 98  | -2.0                  |
|                    | LYS C                                 | 107 | -1.5                  | LYS C              | 107 | -1.6                  |
| APRIL-TACI-HP dp48 | SER A                                 | 86  | -2.9                  | SER A              | 86  | -3.7                  |

|  |       |     |      |       |     |       |
|--|-------|-----|------|-------|-----|-------|
|  | ARG A | 72  | -2.8 | ARG A | 72  | -4.8  |
|  | LYS A | 73  | -3.0 | LYS A | 73  | -3.9  |
|  | LYS A | 77  | -3.0 | LYS A | 77  | -3.5  |
|  | ARG A | 84  | -3.6 | ARG A | 84  | -4.7  |
|  | LYS A | 98  | -3.5 | LYS A | 98  | -3.8  |
|  | CYX B | 71  | -2.8 | CYX B | 71  | -3.2  |
|  | ARG B | 72  | -2.7 | ARG B | 72  | -3.1  |
|  | LYS B | 73  | -2.8 | LYS B | 73  | -3.2  |
|  | LYS B | 77  | -2.9 | LYS B | 77  | -3.3  |
|  | ARG B | 84  | -3.5 | ARG B | 84  | -3.9  |
|  | LYS B | 98  | -3.1 | LYS B | 98  | -3.4  |
|  | CYX C | 71  | -5.7 | CYX C | 71  | -4.6  |
|  | ARG C | 72  | -8.9 | ARG C | 72  | -11.8 |
|  | LYS C | 73  | -6.1 | LYS C | 73  | -8.5  |
|  | LYS C | 77  | -3.9 | LYS C | 77  | -4.5  |
|  | ARG C | 84  | -7.1 | ARG C | 84  | -6.5  |
|  | LYS C | 98  | -3.7 | LYS C | 98  | -3.9  |
|  | LYS C | 107 | -3.7 | LYS C | 107 | -3.9  |

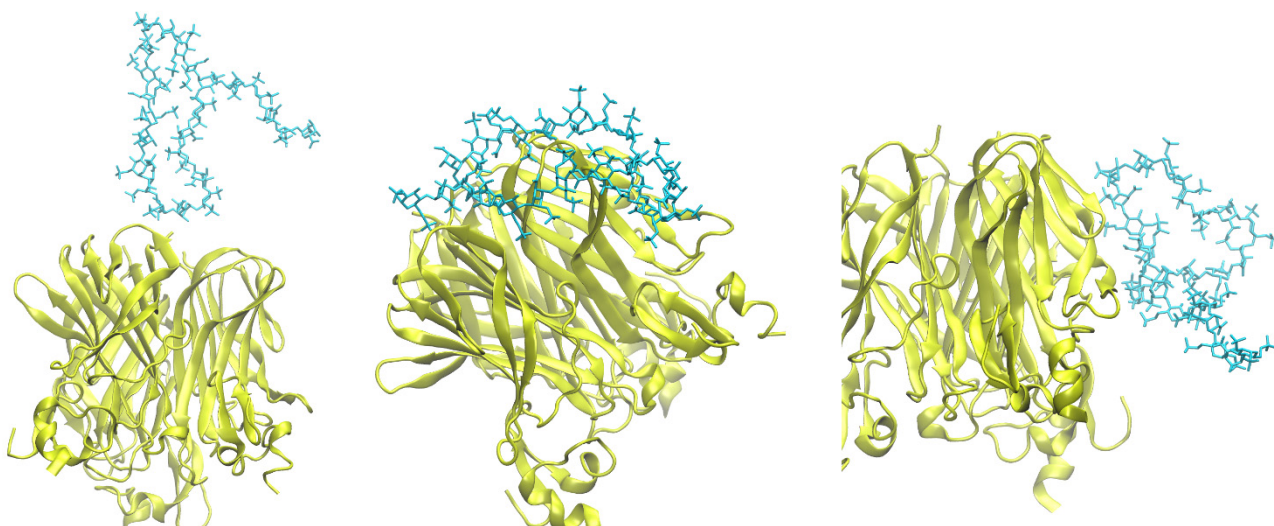

**Figure S1.** Five docked posed selected out of top 50 (in terms of energy evaluation with Autodock3) that were distorted in terms of the global heparin geometry for APRIL-BCMA complex (heparin in licorice representation, cyan colour; APRIL and BCMA in cartoon representation, yellow colour).

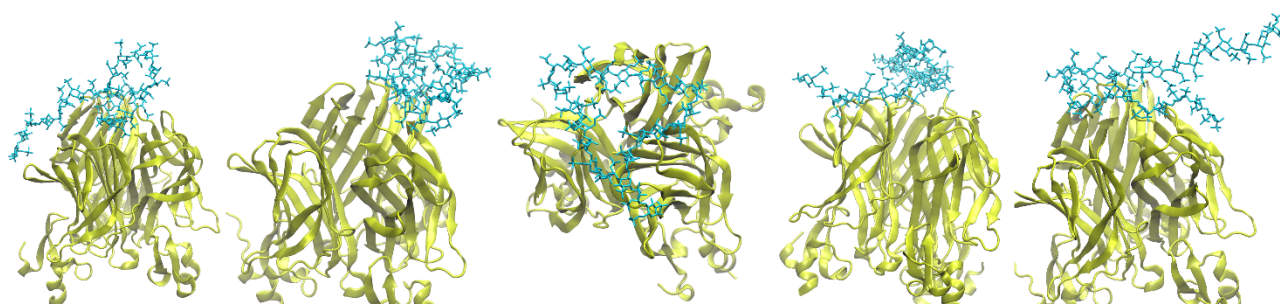

**Figure S2.** Five docked posed selected out of top 50 (in terms of energy evaluation with Autodock3) that were distorted in terms of the global heparin geometry for APRIL-TACI complex (heparin in licorice representation, cyan colour; APRIL and TACI in cartoon representation, yellow colour).

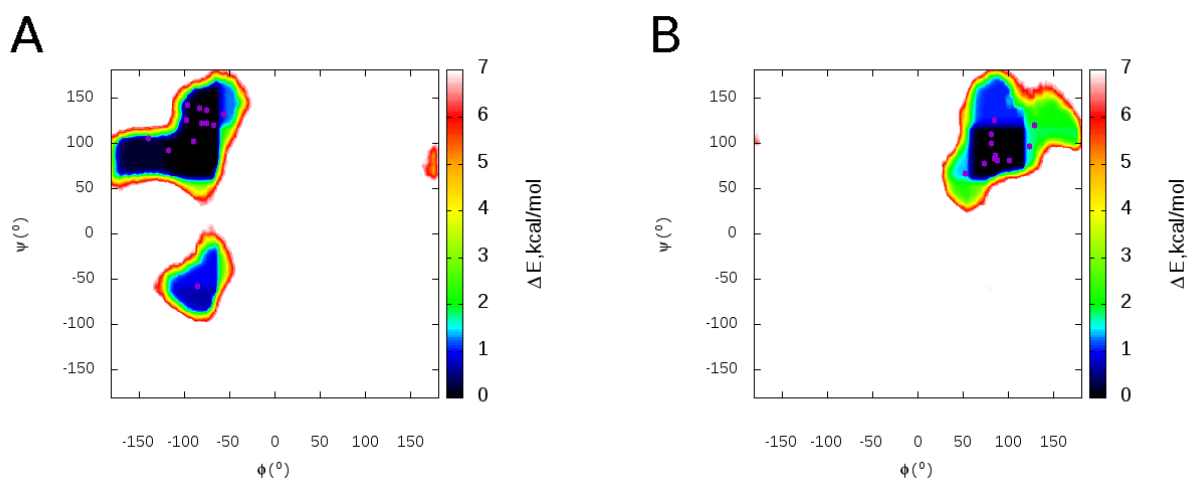

**Figure S3.** Glycosidic linkage heatmaps for HP  $\phi$  and  $\psi$  dihedral angles defined as  $O5_{n+1}-C1_{n+1}-O4_n-C4_n$  and  $C1_{n+1}-O4_n-C4_n-C4_n$  where  $n$  stands for sequential number of a sugar monomeric unit, the data are obtained from 5  $\mu$ s MD simulation for the unbound HP dp10. The data for glycosidic linkages of each type (GlcNS(6S)-IdoA(2S) in A and GlcNS(6S)-IdoA(2S) in B) are averaged. The data for glycosidic linkages for one of the distorted poses of HP dp24 docked to APRIL/BCMA obtained with Autodock3 are in magenta points.

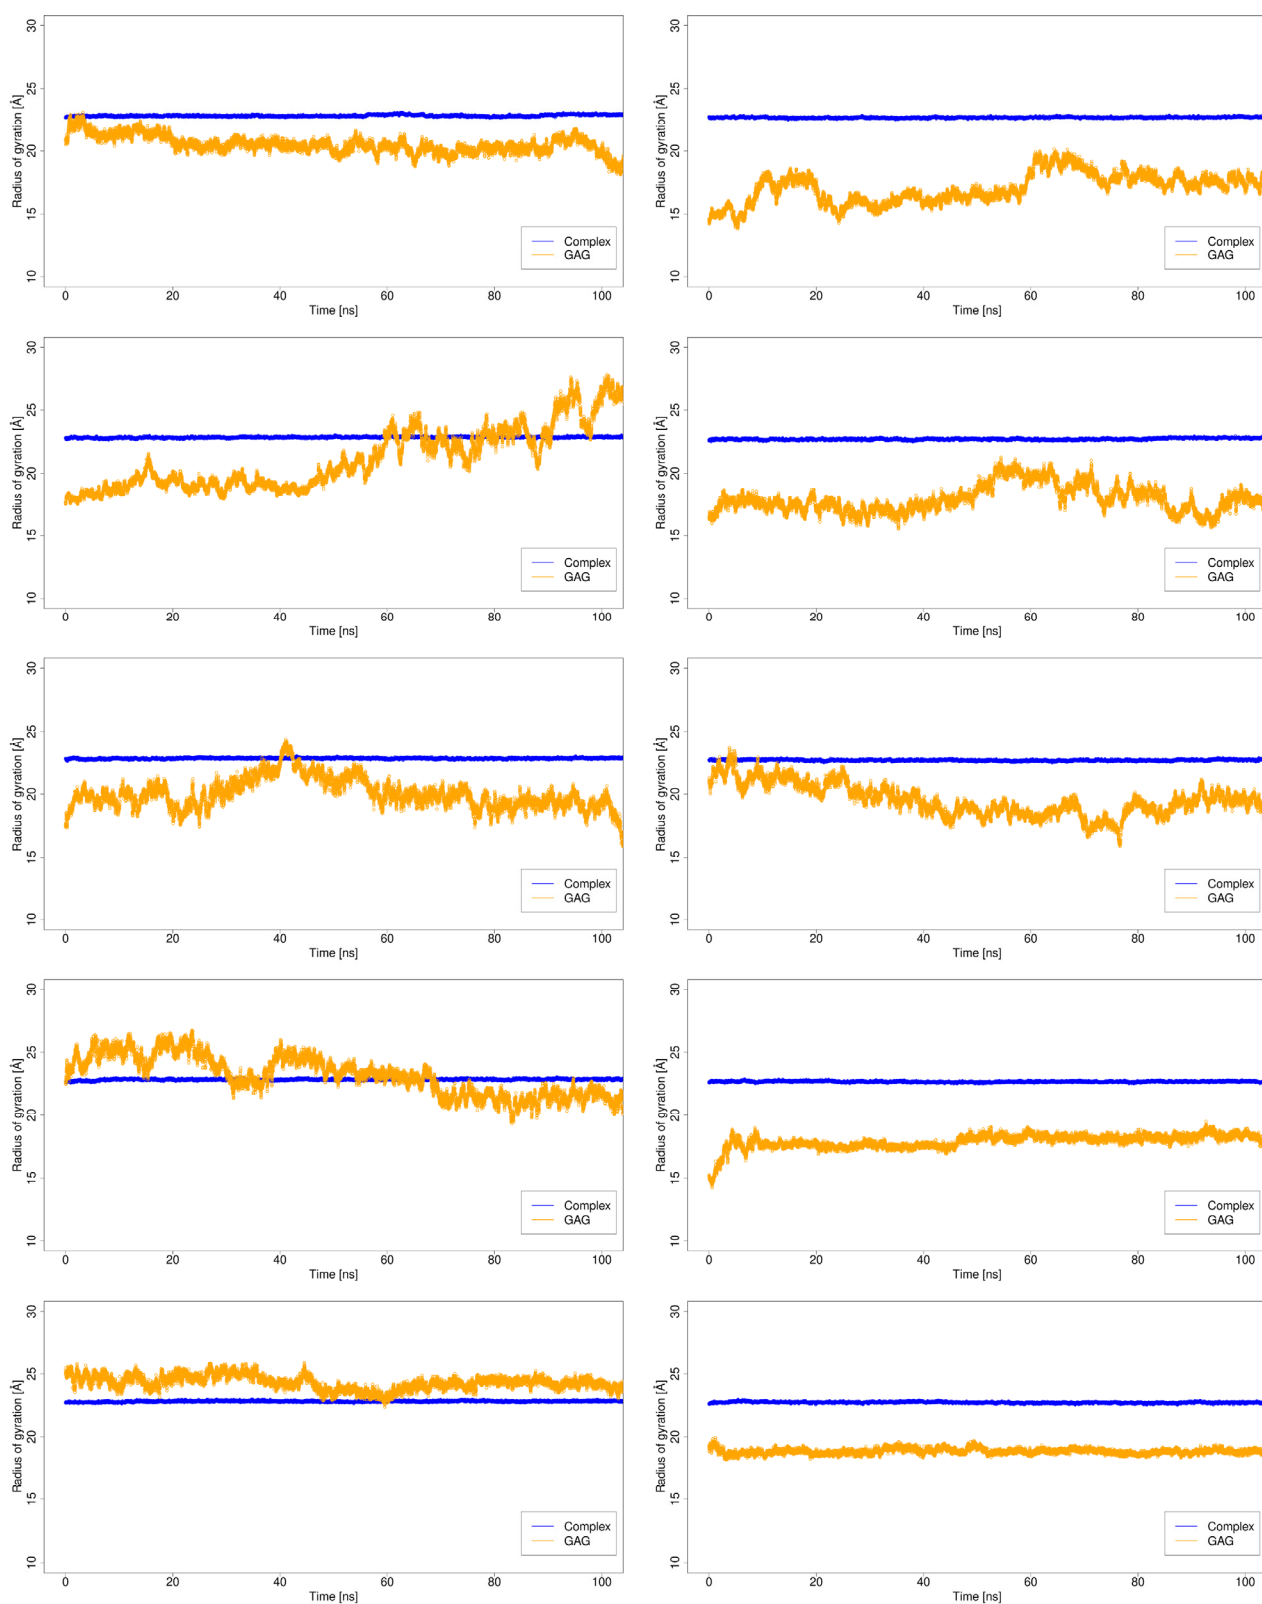

**Figure S4.** APRIL-BCMA-HP dp24 (left panel) and APRIL-TACI-HP dp24 (right panel) per frame Rgyr analysis.

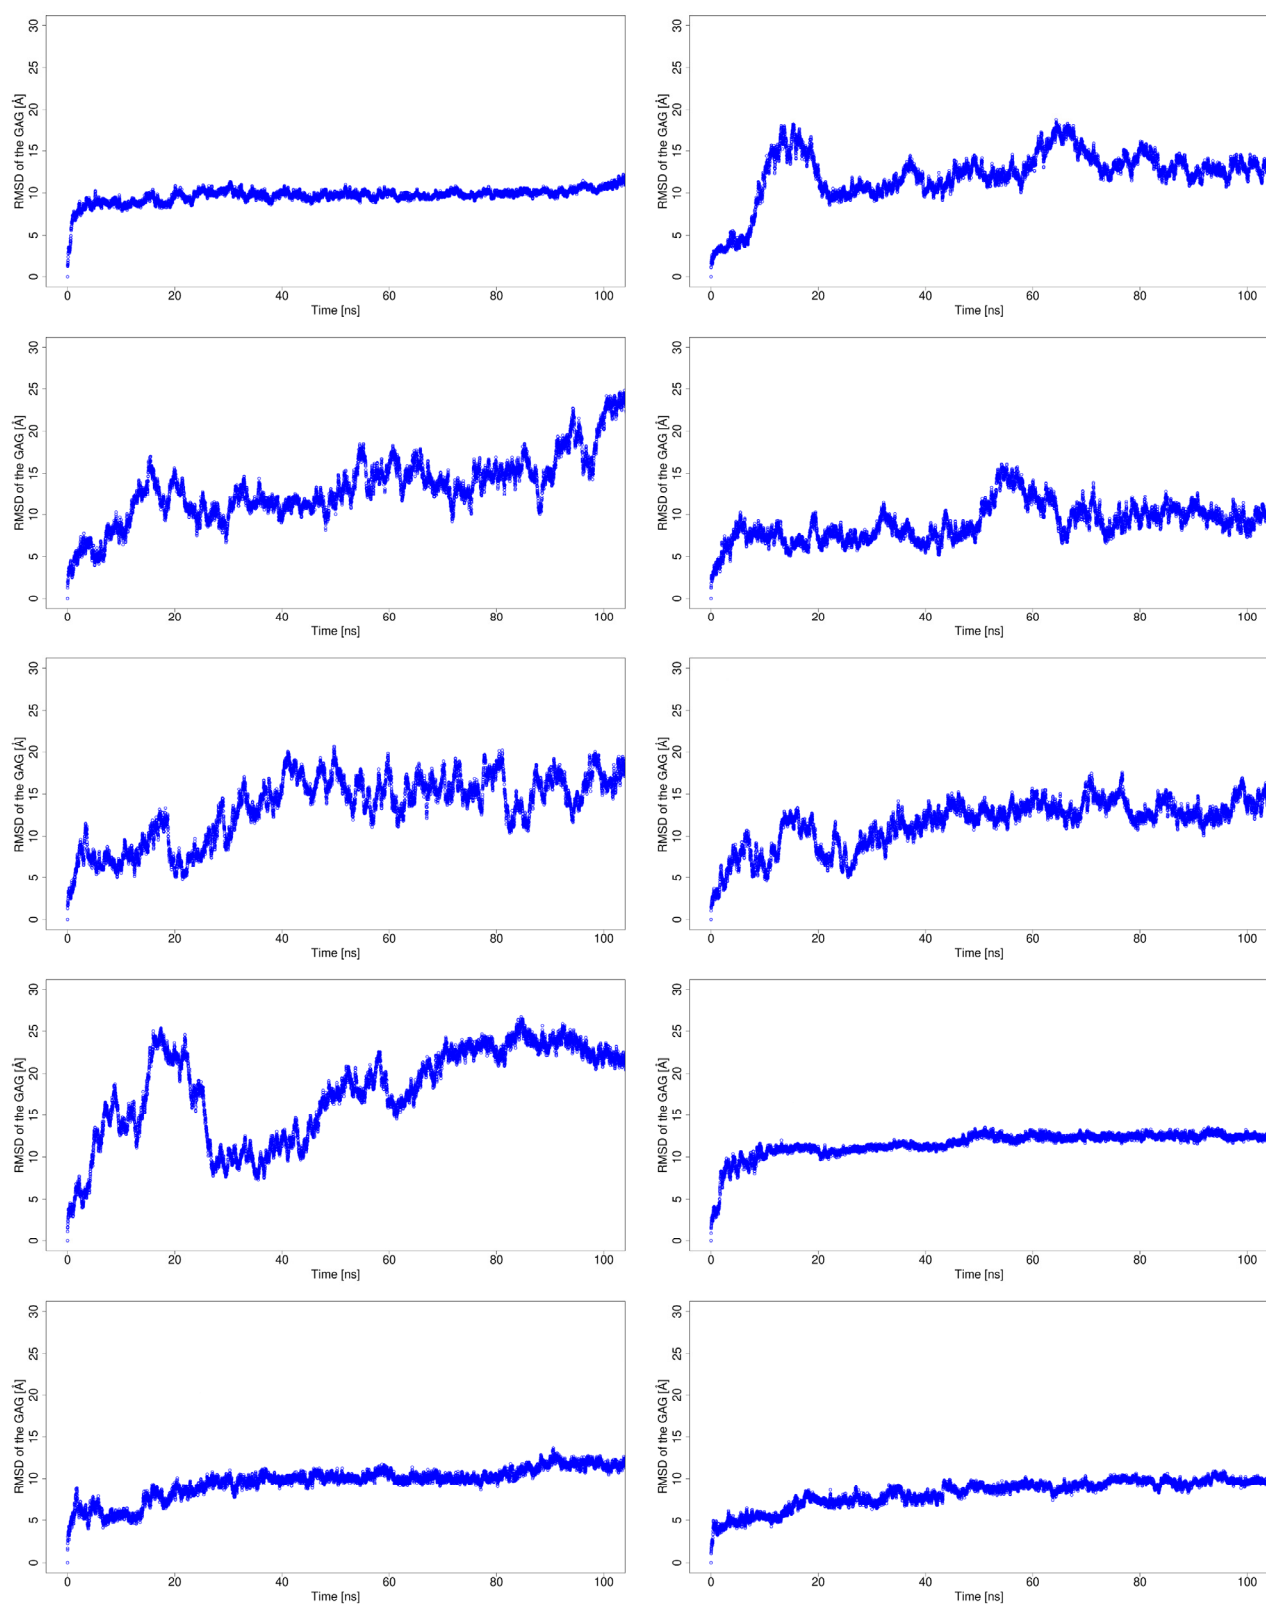

**Figure S5.** APRIL-BCMA-HP dp24 (left panel) and APRIL-TACI-HP dp24 (right panel) per frame RMSD analysis.



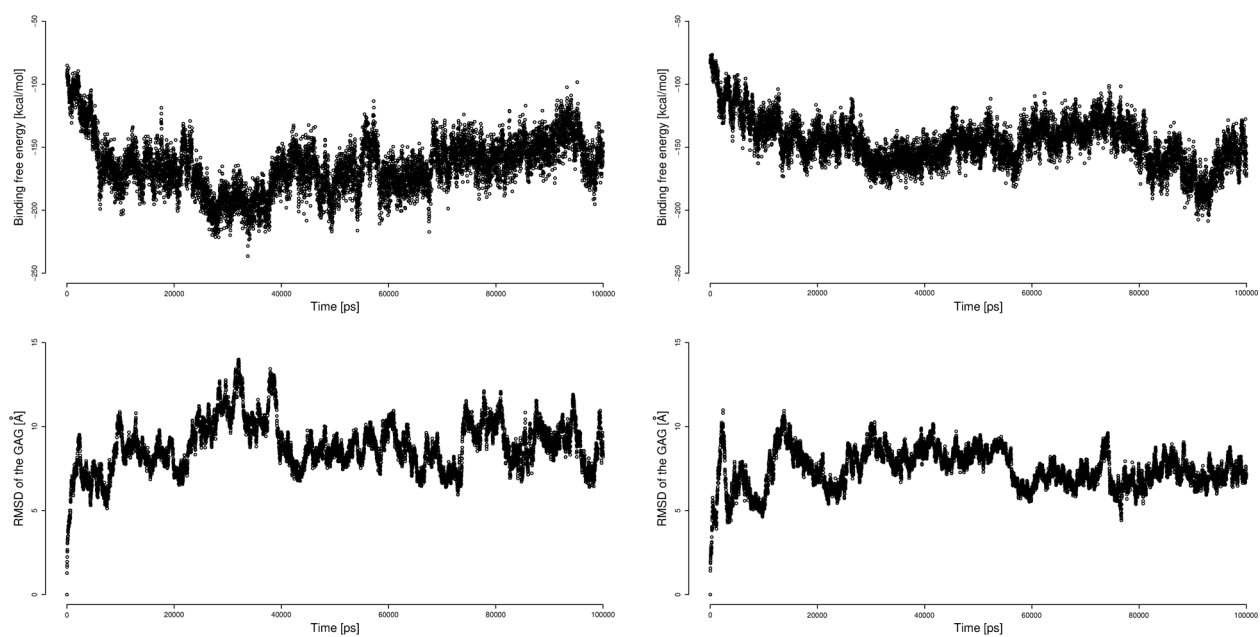

**Figure S6.** Per frame evolution of HP MM/GBSA binding free energy and RMSD for two representative APRIL-BCMA-HP dp24 (left panel) and APRIL-TACI-HP dp24 (right panel) RS-REMD refinement MD simulations corresponding to the lowest free energy values.

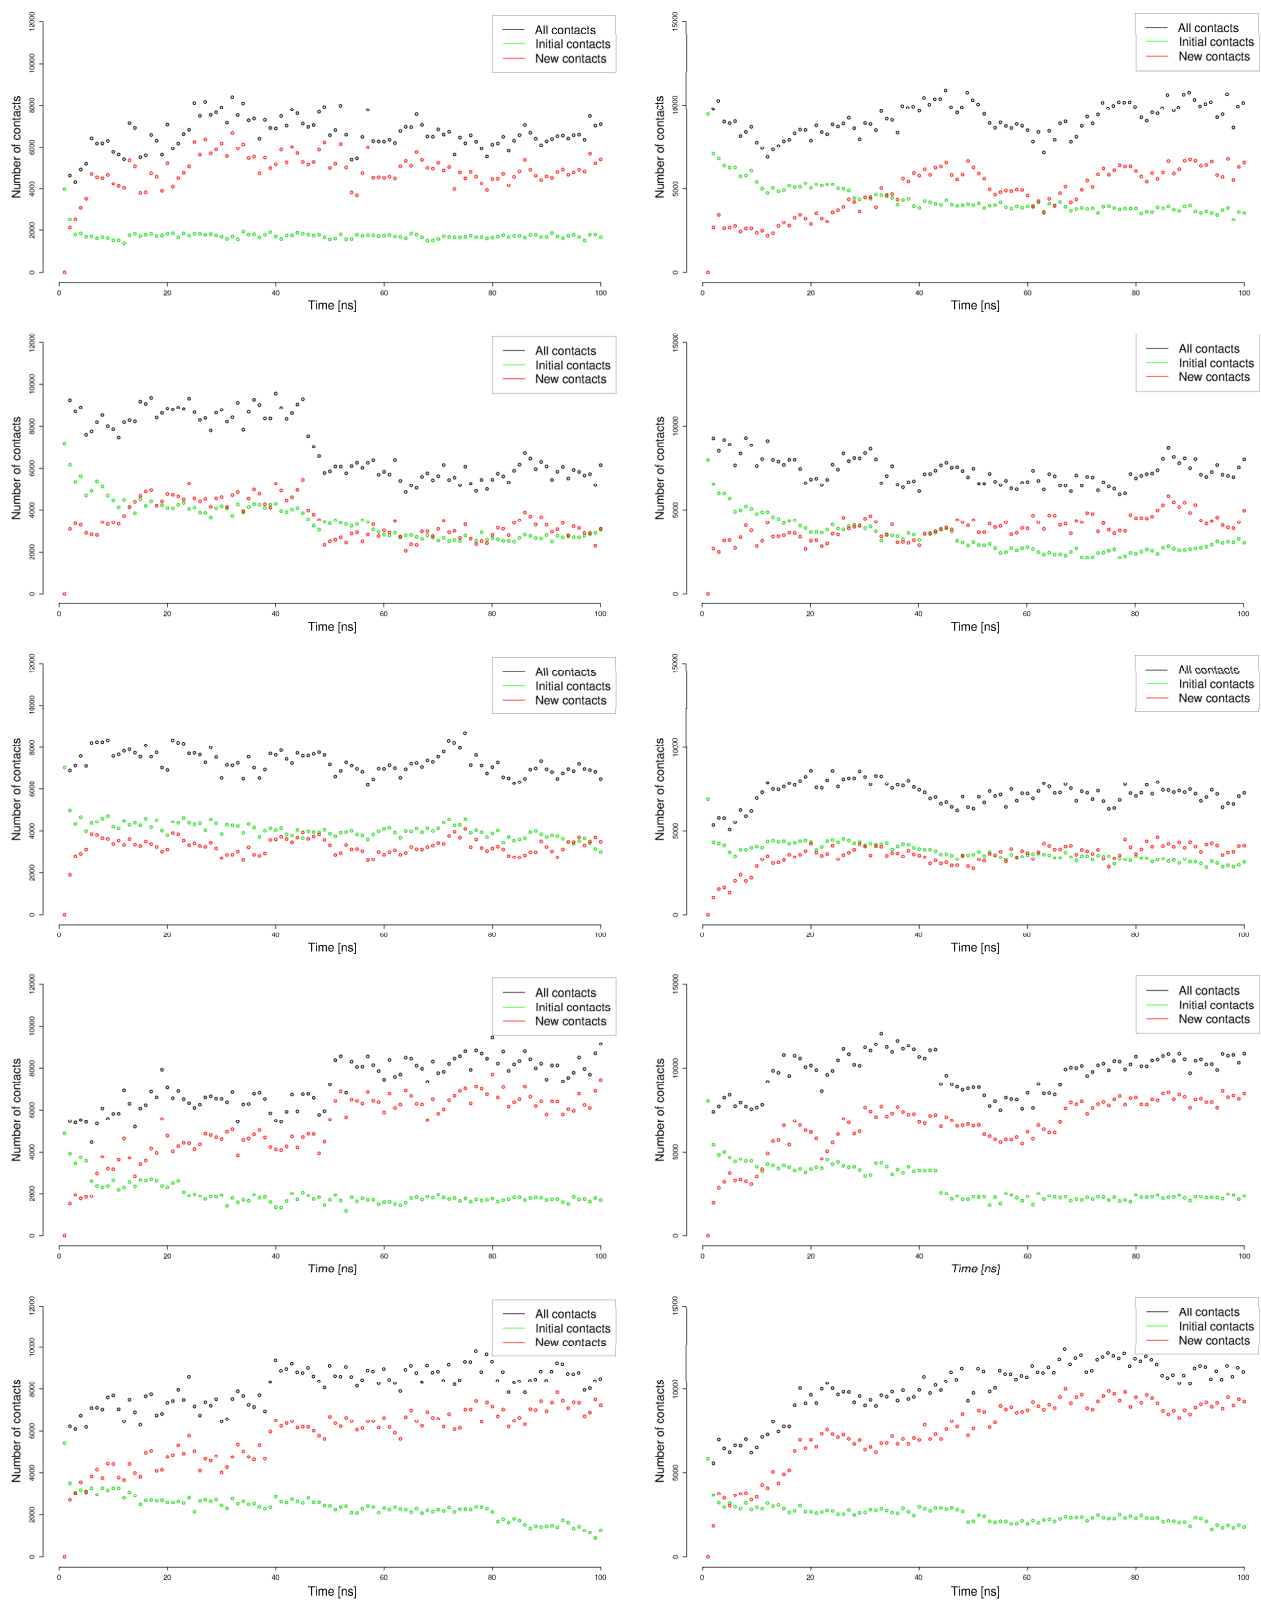

**Figure S7.** AD3-predicted APRIL-BCMA-HP dp24 (left panel) and APRIL-TACI-HP dp24 (right panel) contact number analysis.

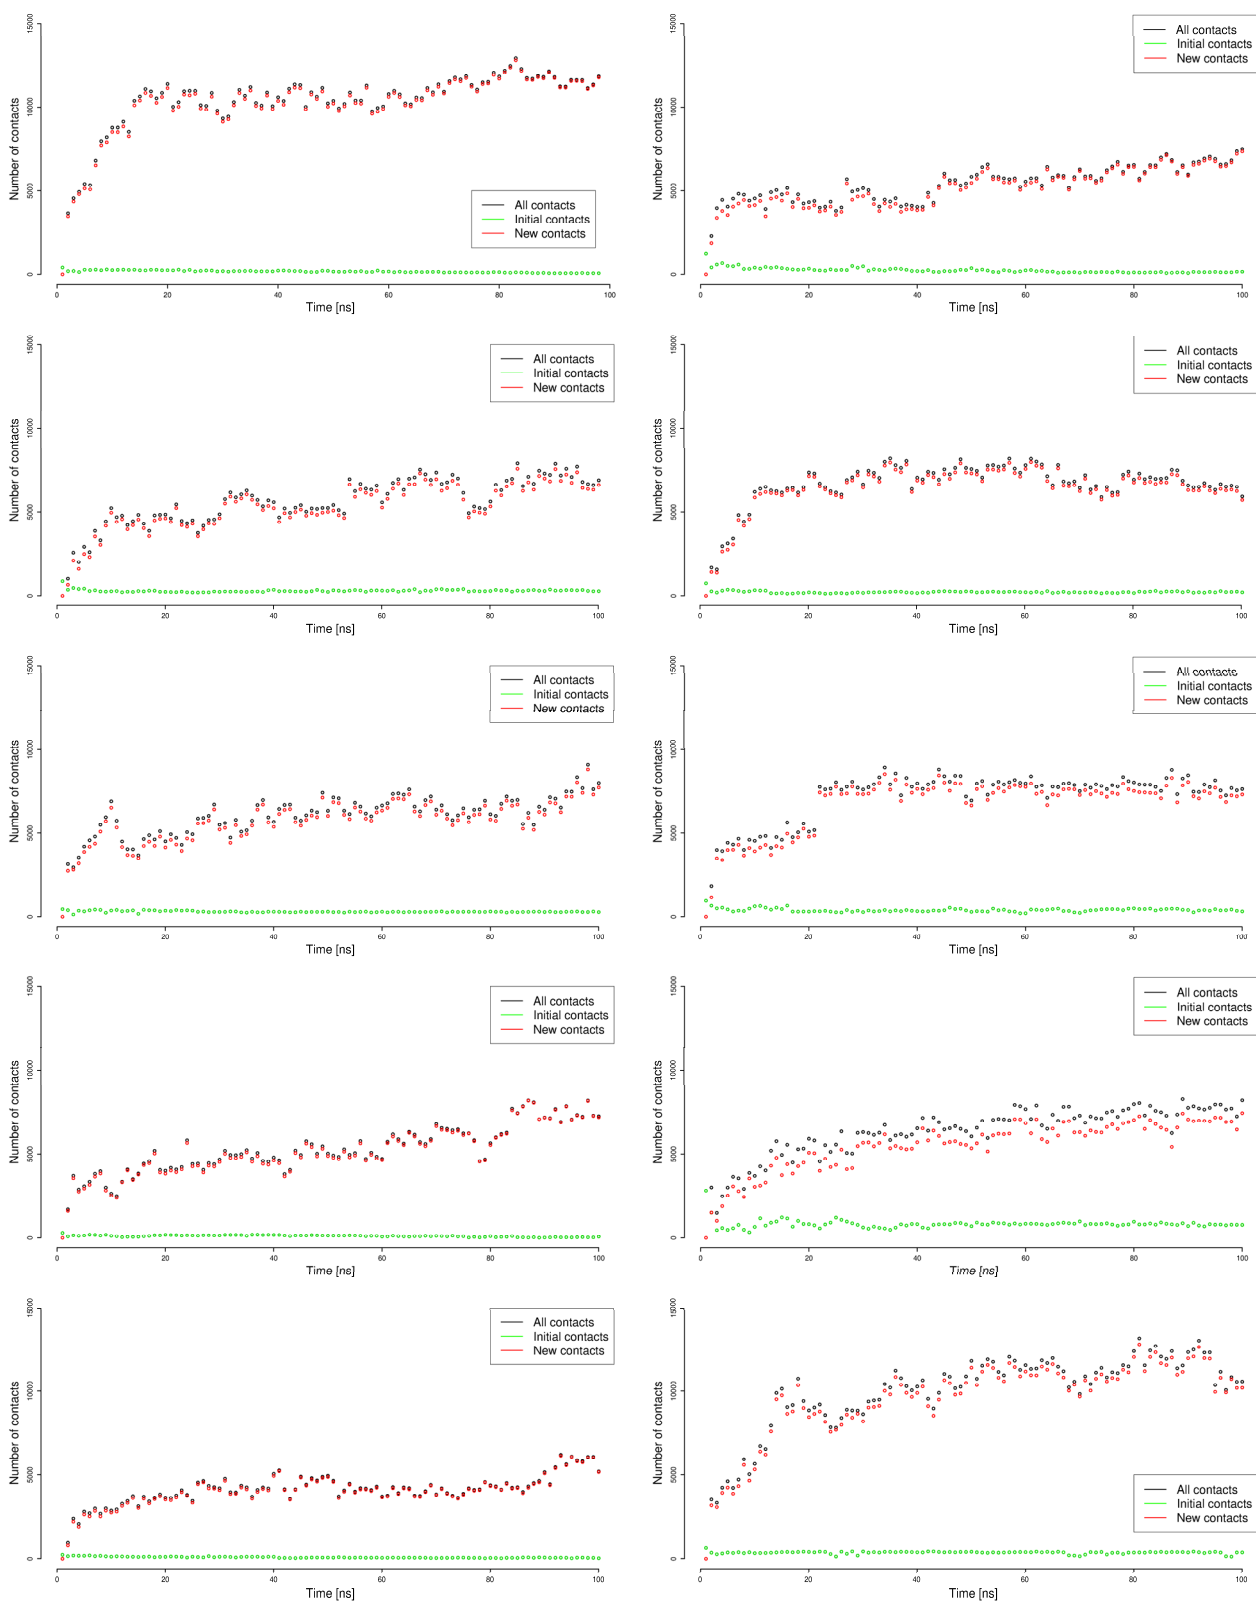

**Figure S8.** RS-REMD-predicted APRIL-BCMA-HP dp24 (left panel) and APRIL-TACI-HP dp24 (right panel) contact number analysis.

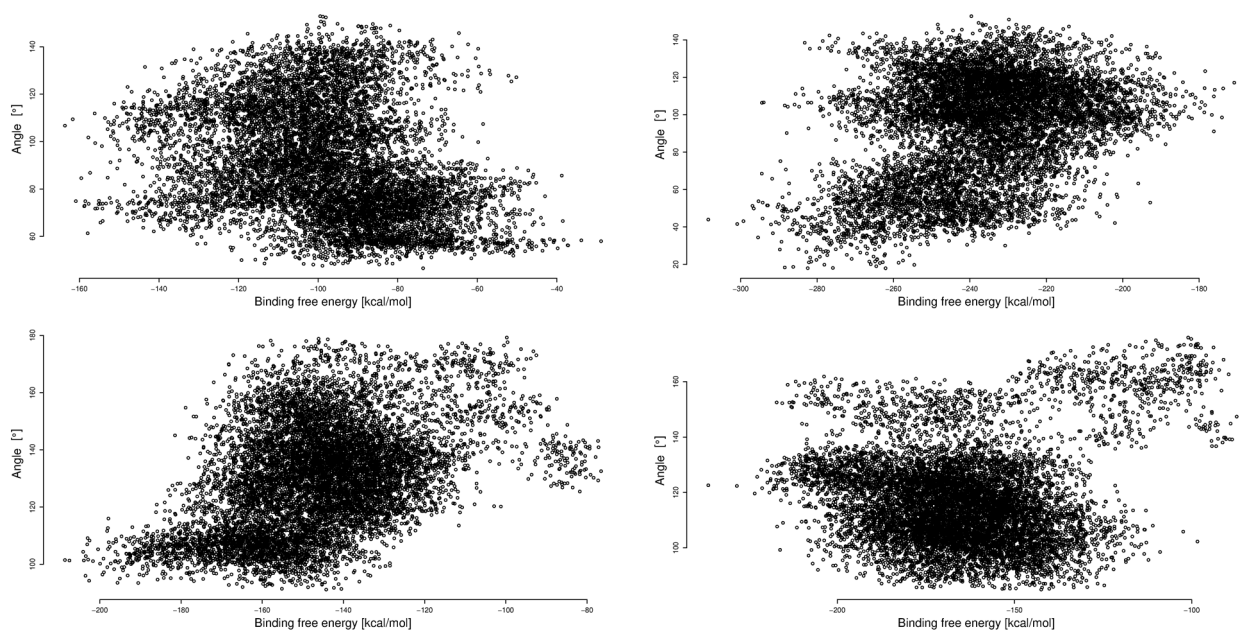

**Figure S9.** MM/GBSA free binding energy dependence on the angle defined by the terminal (the first) monosaccharide unit of HP-central atom of the HP chain-the terminal (the last) monosaccharide unit of HP obtained by AD3 and RS-REMD approaches for APRIL-BCMA-HP dp24 (left panel) and APRIL-TACI-HP dp24 (right panel) complexes.
